# Supplementary material for: Unlocking marine treasures: isolation and mining strategies of natural products from sponge-associated bacteria
Source: Royal Society of Chemistry journal article supplement (doi:10.1039/d5np00013k), 2025-01-01
Supplement: d5np00013k1.pdf [file d5np00013k1.pdf]

Manuscript NP-REV-02-2025-000013

## Supplementary information for

# Unlocking Marine Treasures: Isolation and Mining Strategies of Natural Products from Sponge-Associated Bacteria

Jeong-A Kim<sup>a</sup>, Si-sun Choi<sup>b</sup>, Jae Kyu Lim<sup>\*ac</sup> and Eung-Soo Kim<sup>\*b</sup>

*\*Corresponding authors*

<sup>a</sup>Korea Institute of Ocean Science and Technology (KIOST), Jeju Bio Research Center, Jeju 63349, Republic of Korea. E-mail: j.k.lim@kiost.ac.kr

<sup>b</sup>Department of Biological Sciences and Bioengineering, Inha University, Incheon, 22212, Republic of Korea. E-mail: eungsoo@inha.ac.kr

<sup>c</sup>University of Science and Technology (UST), KIOST School, Daejeon 34113, Republic of Korea

## Table of Contents:

Supplementary Figures (Fig. S1-S5)

pages 2-8

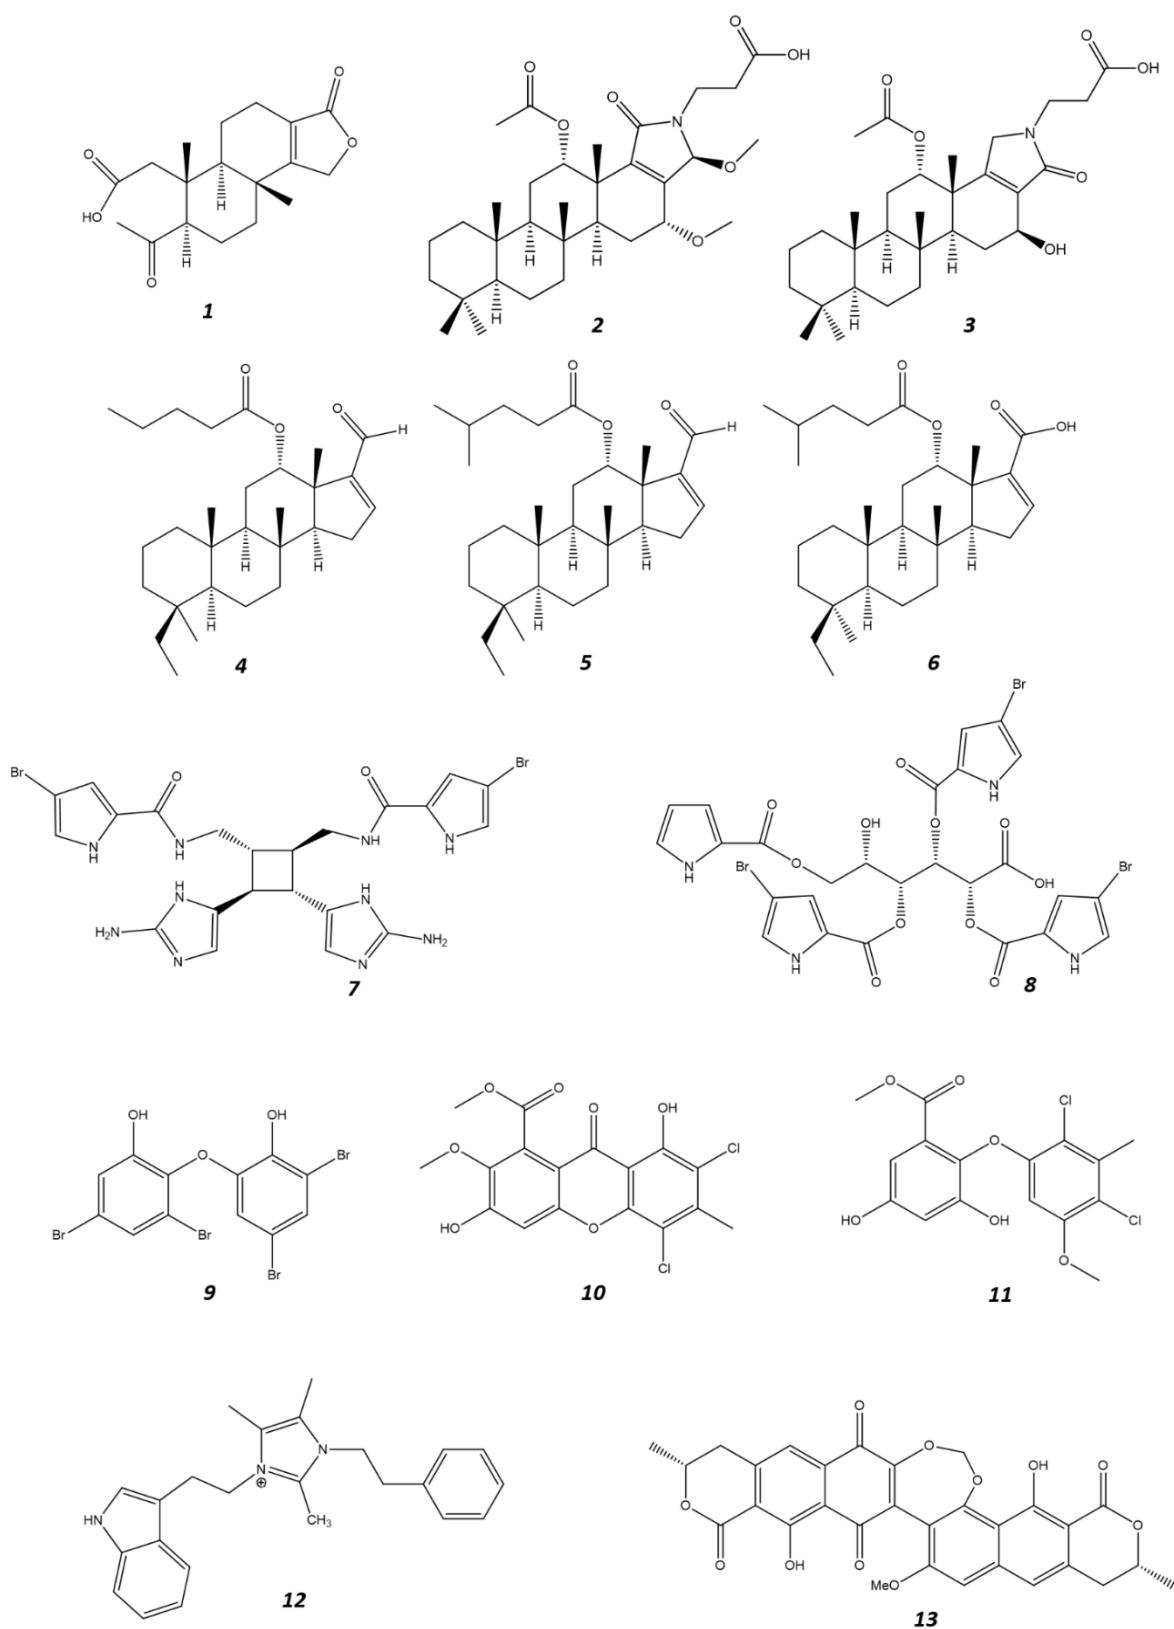

Fig. S1. Antimicrobial and Antiparasitic Activities NPs (continued)

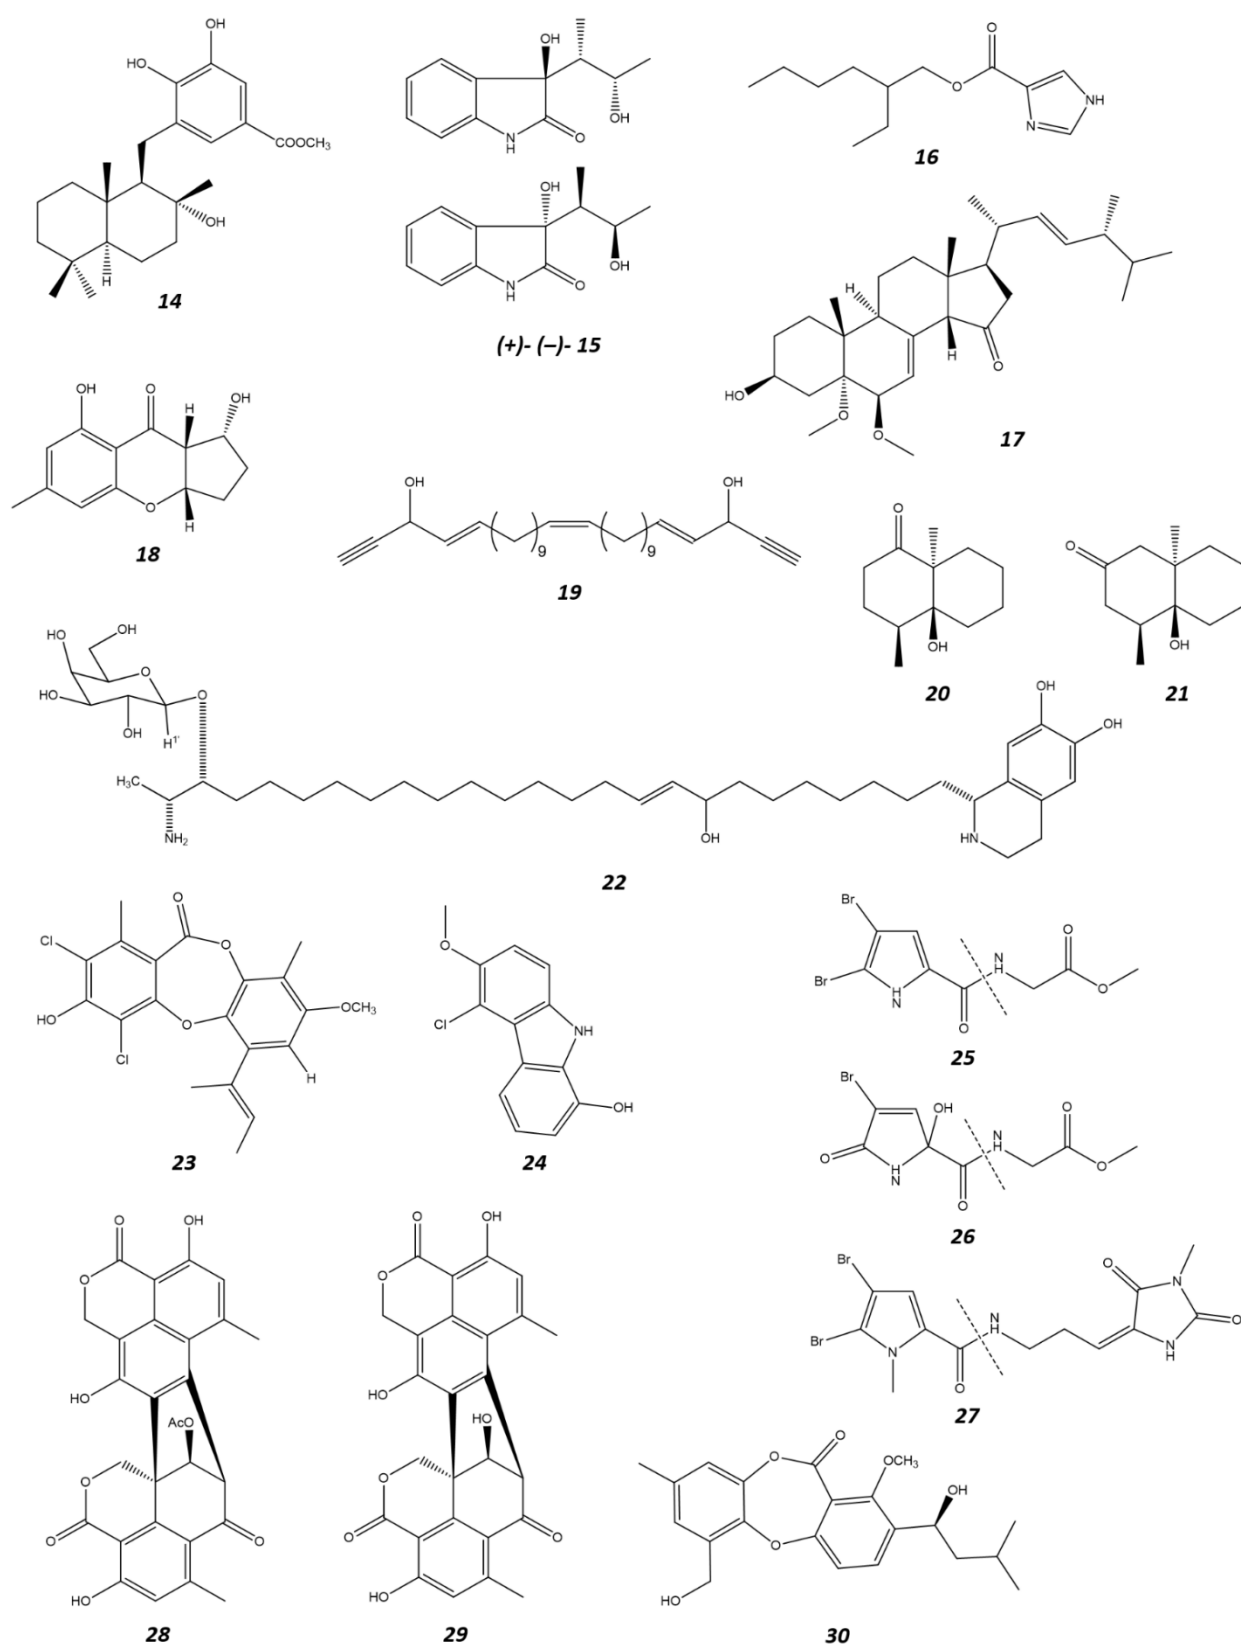

**Fig. S1. Antimicrobial and Antiparasitic Activities NPs (continued)**

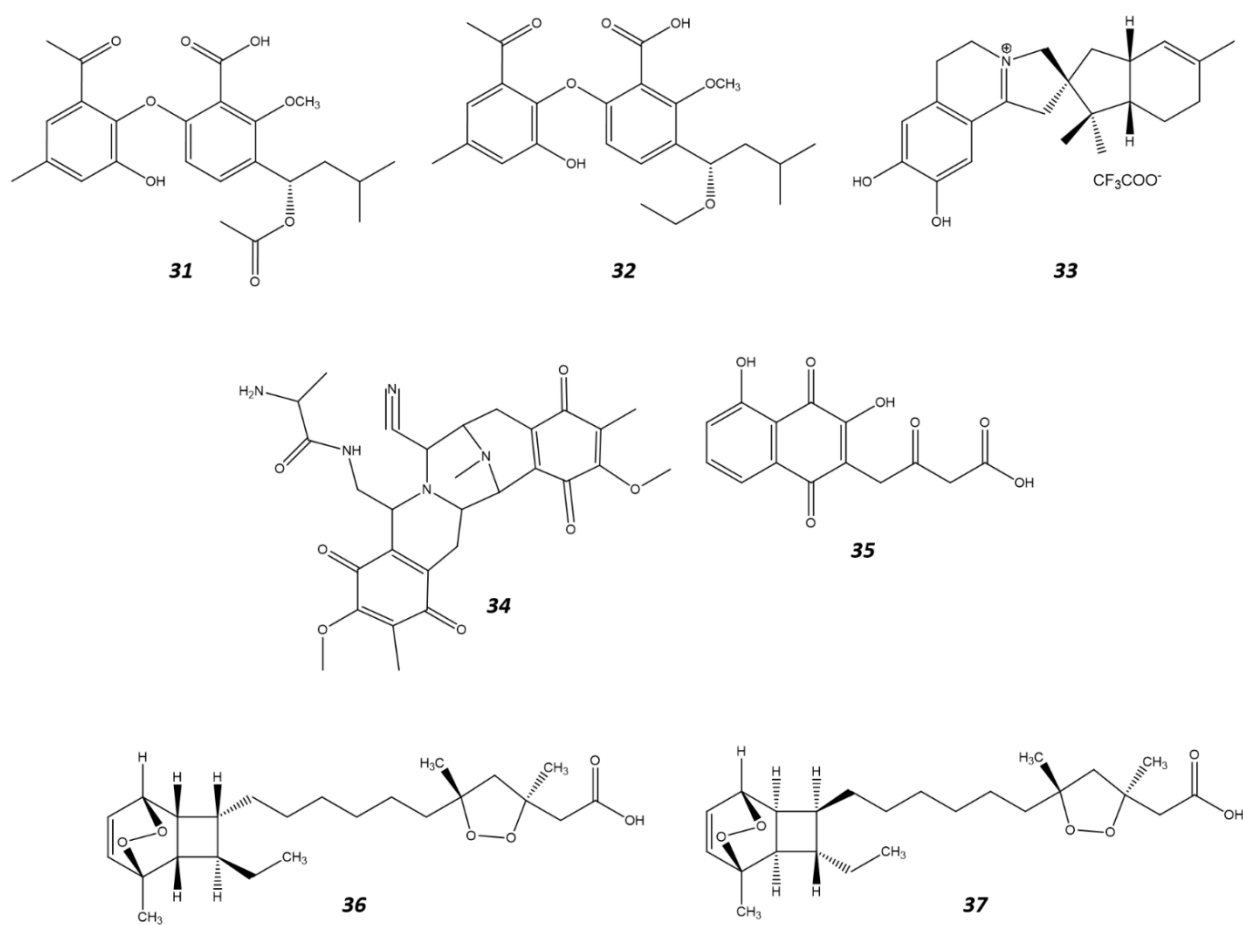

Fig. S1. Antimicrobial and Antiparasitic Activities NPs

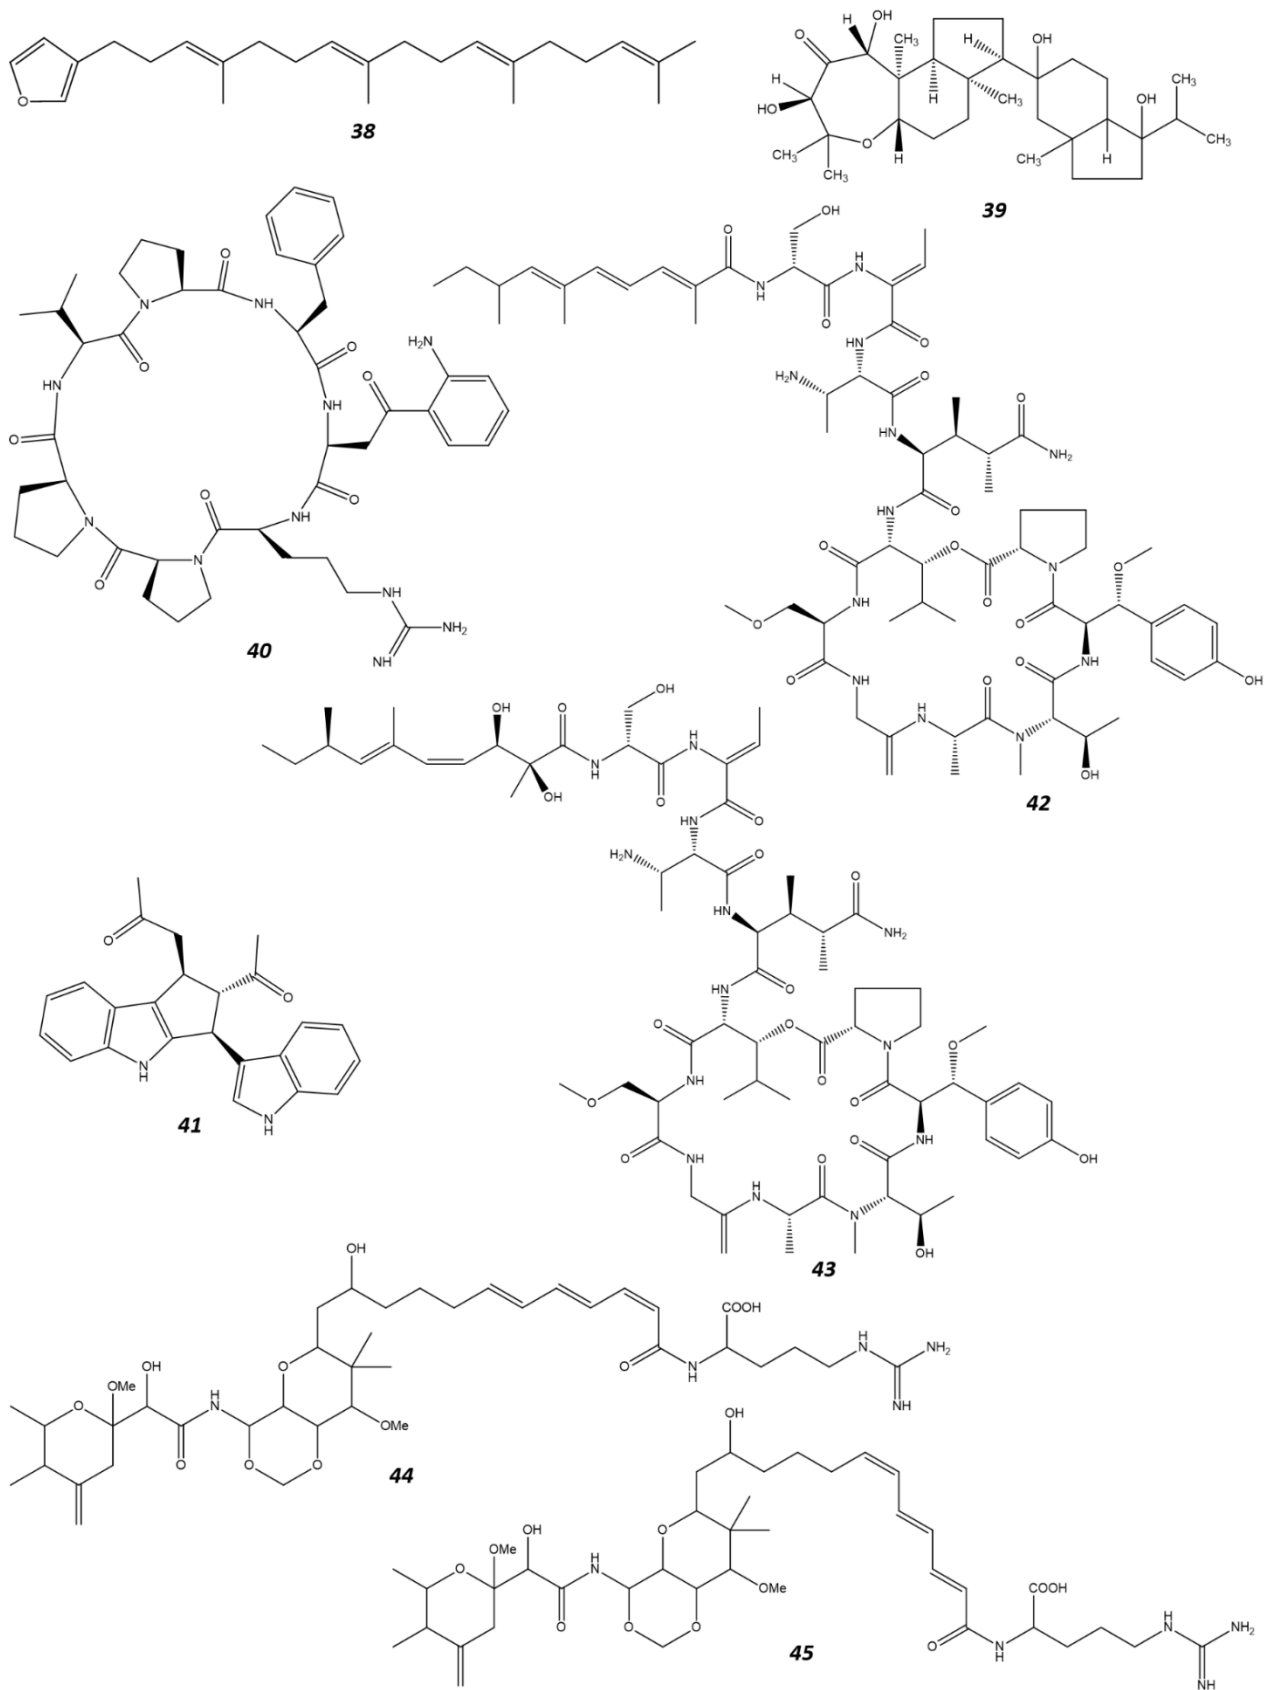

Fig. S2. Anticancer and Cytotoxicity Activities NPs (continued)

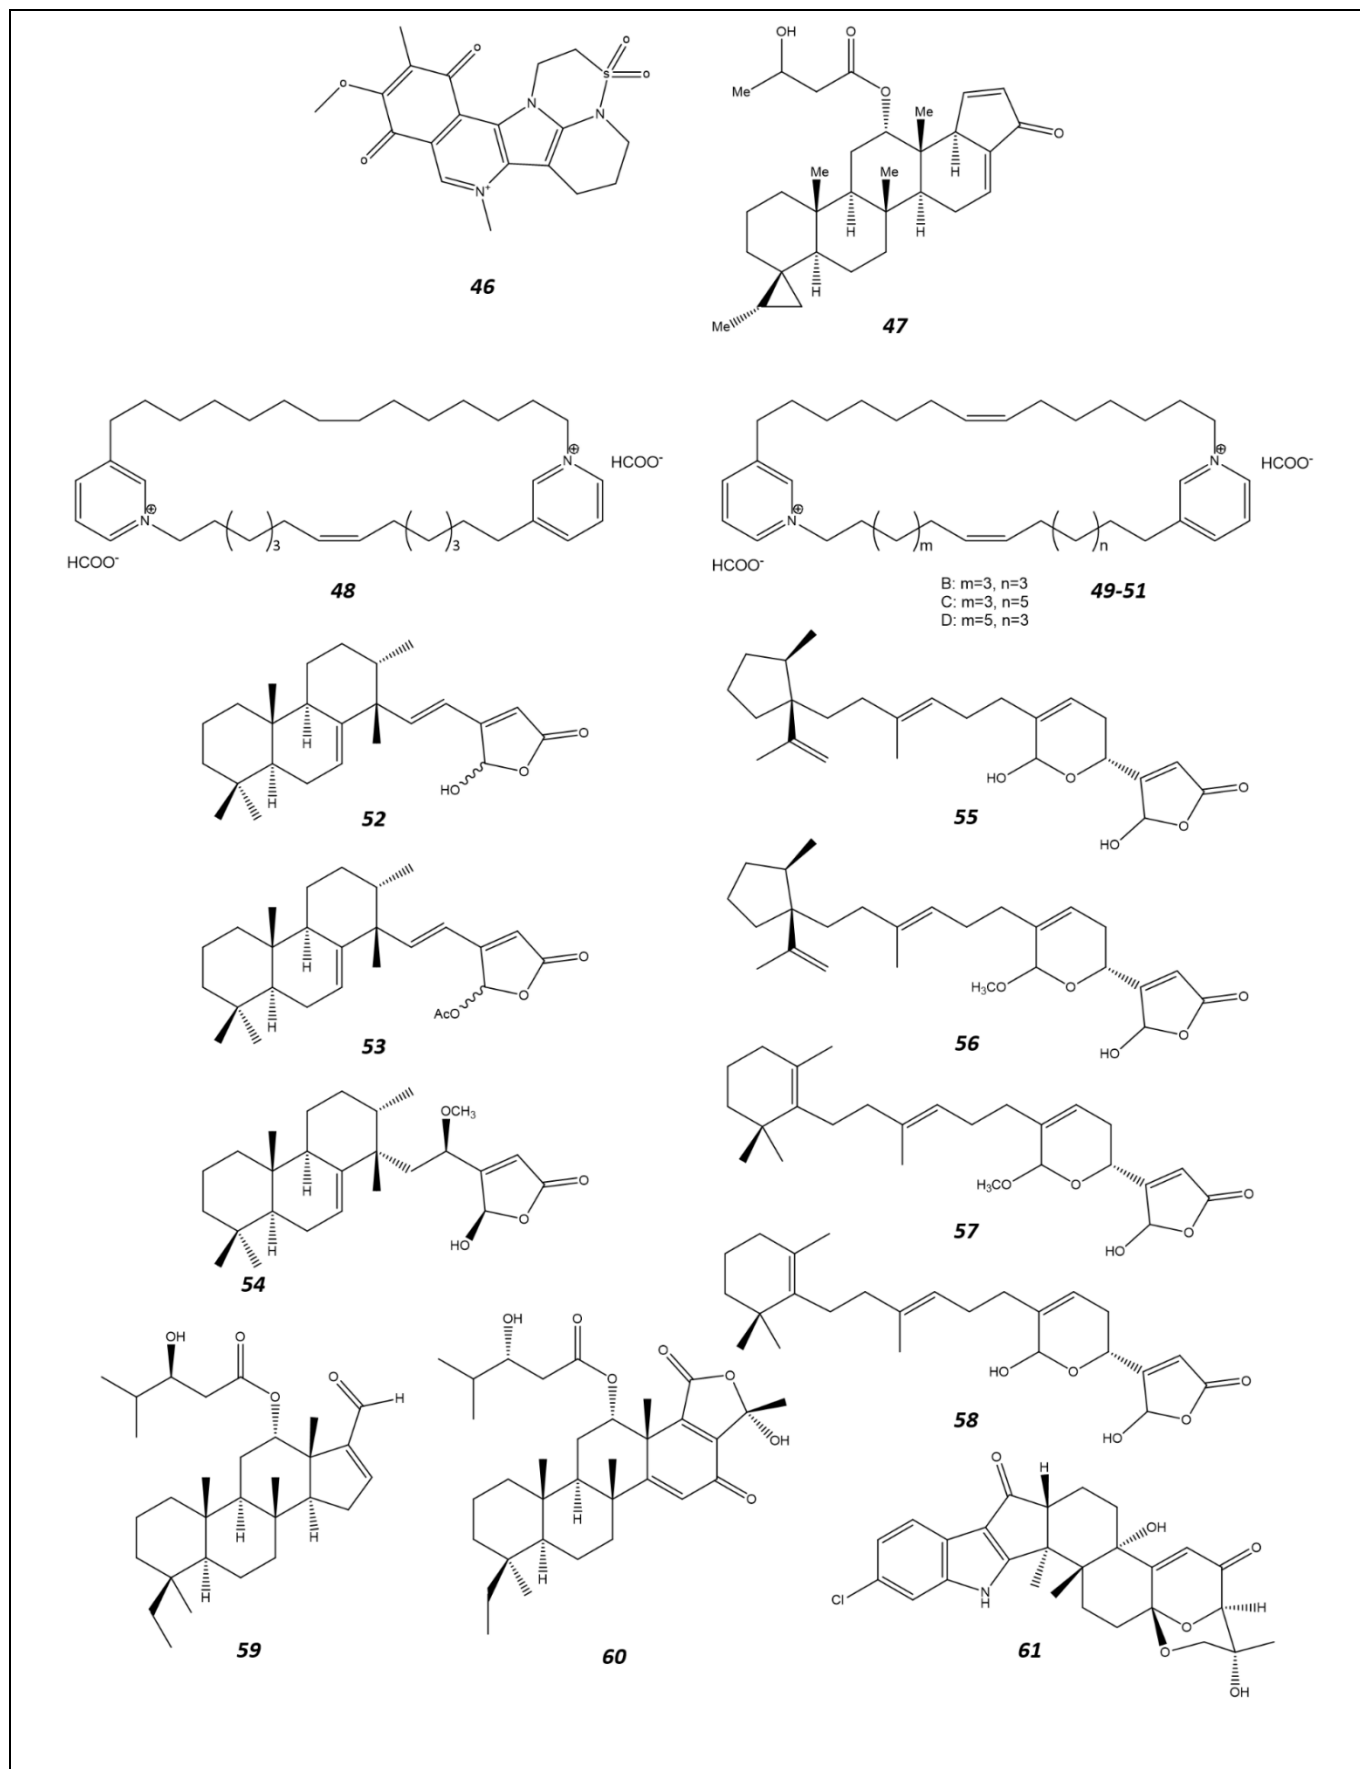

Fig. S2. Anticancer and Cytotoxicity Activities NPs (continued)

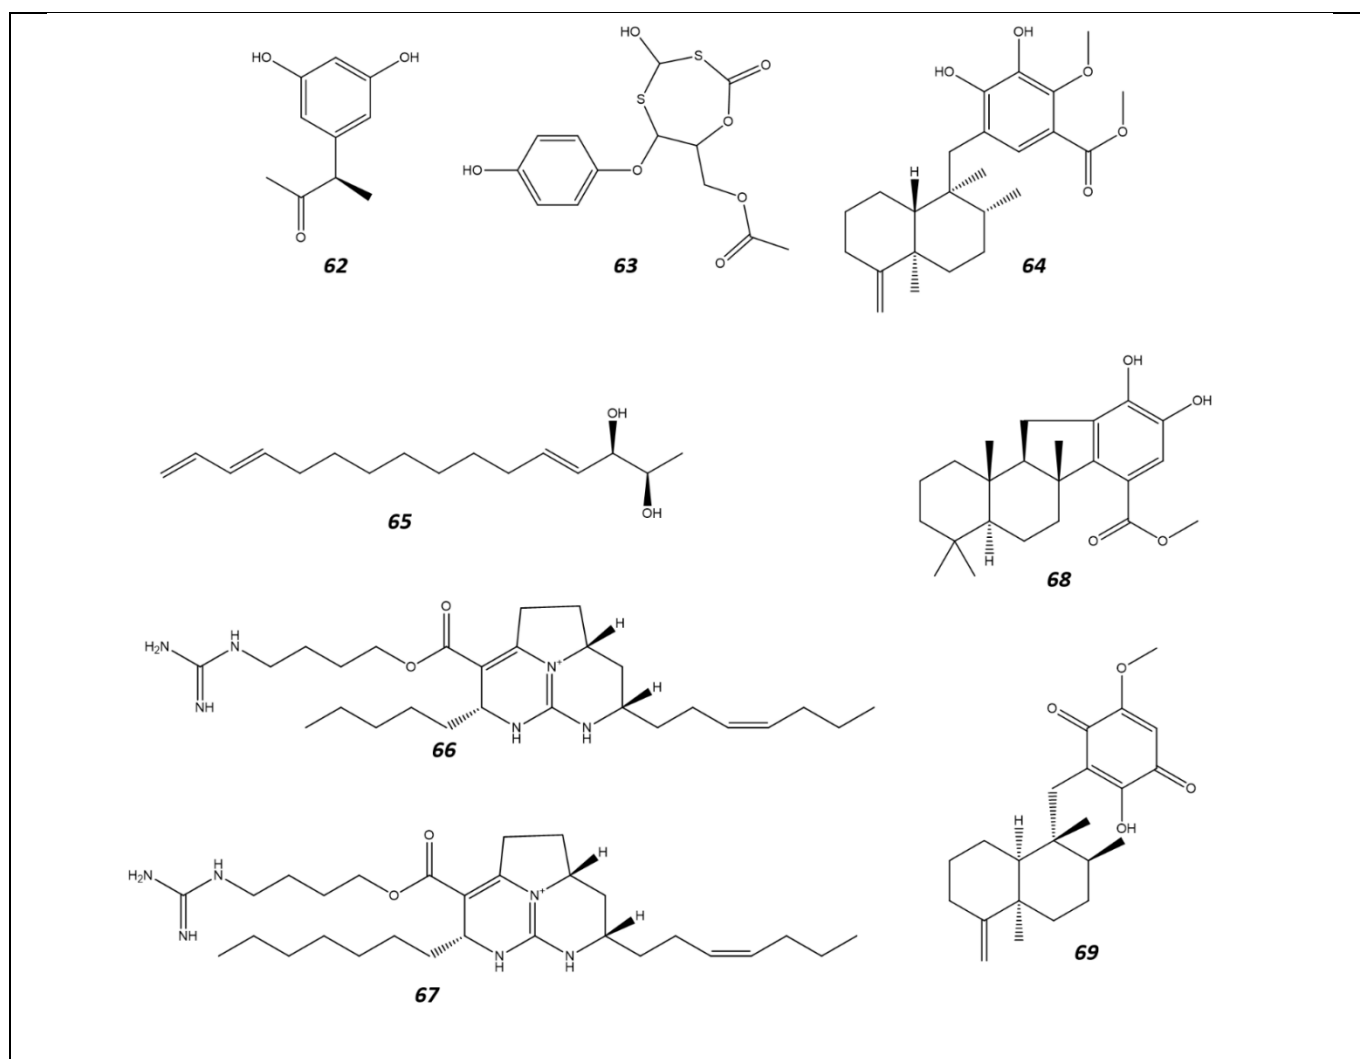

Fig. S2. Anticancer and Cytotoxicity Activities NPs

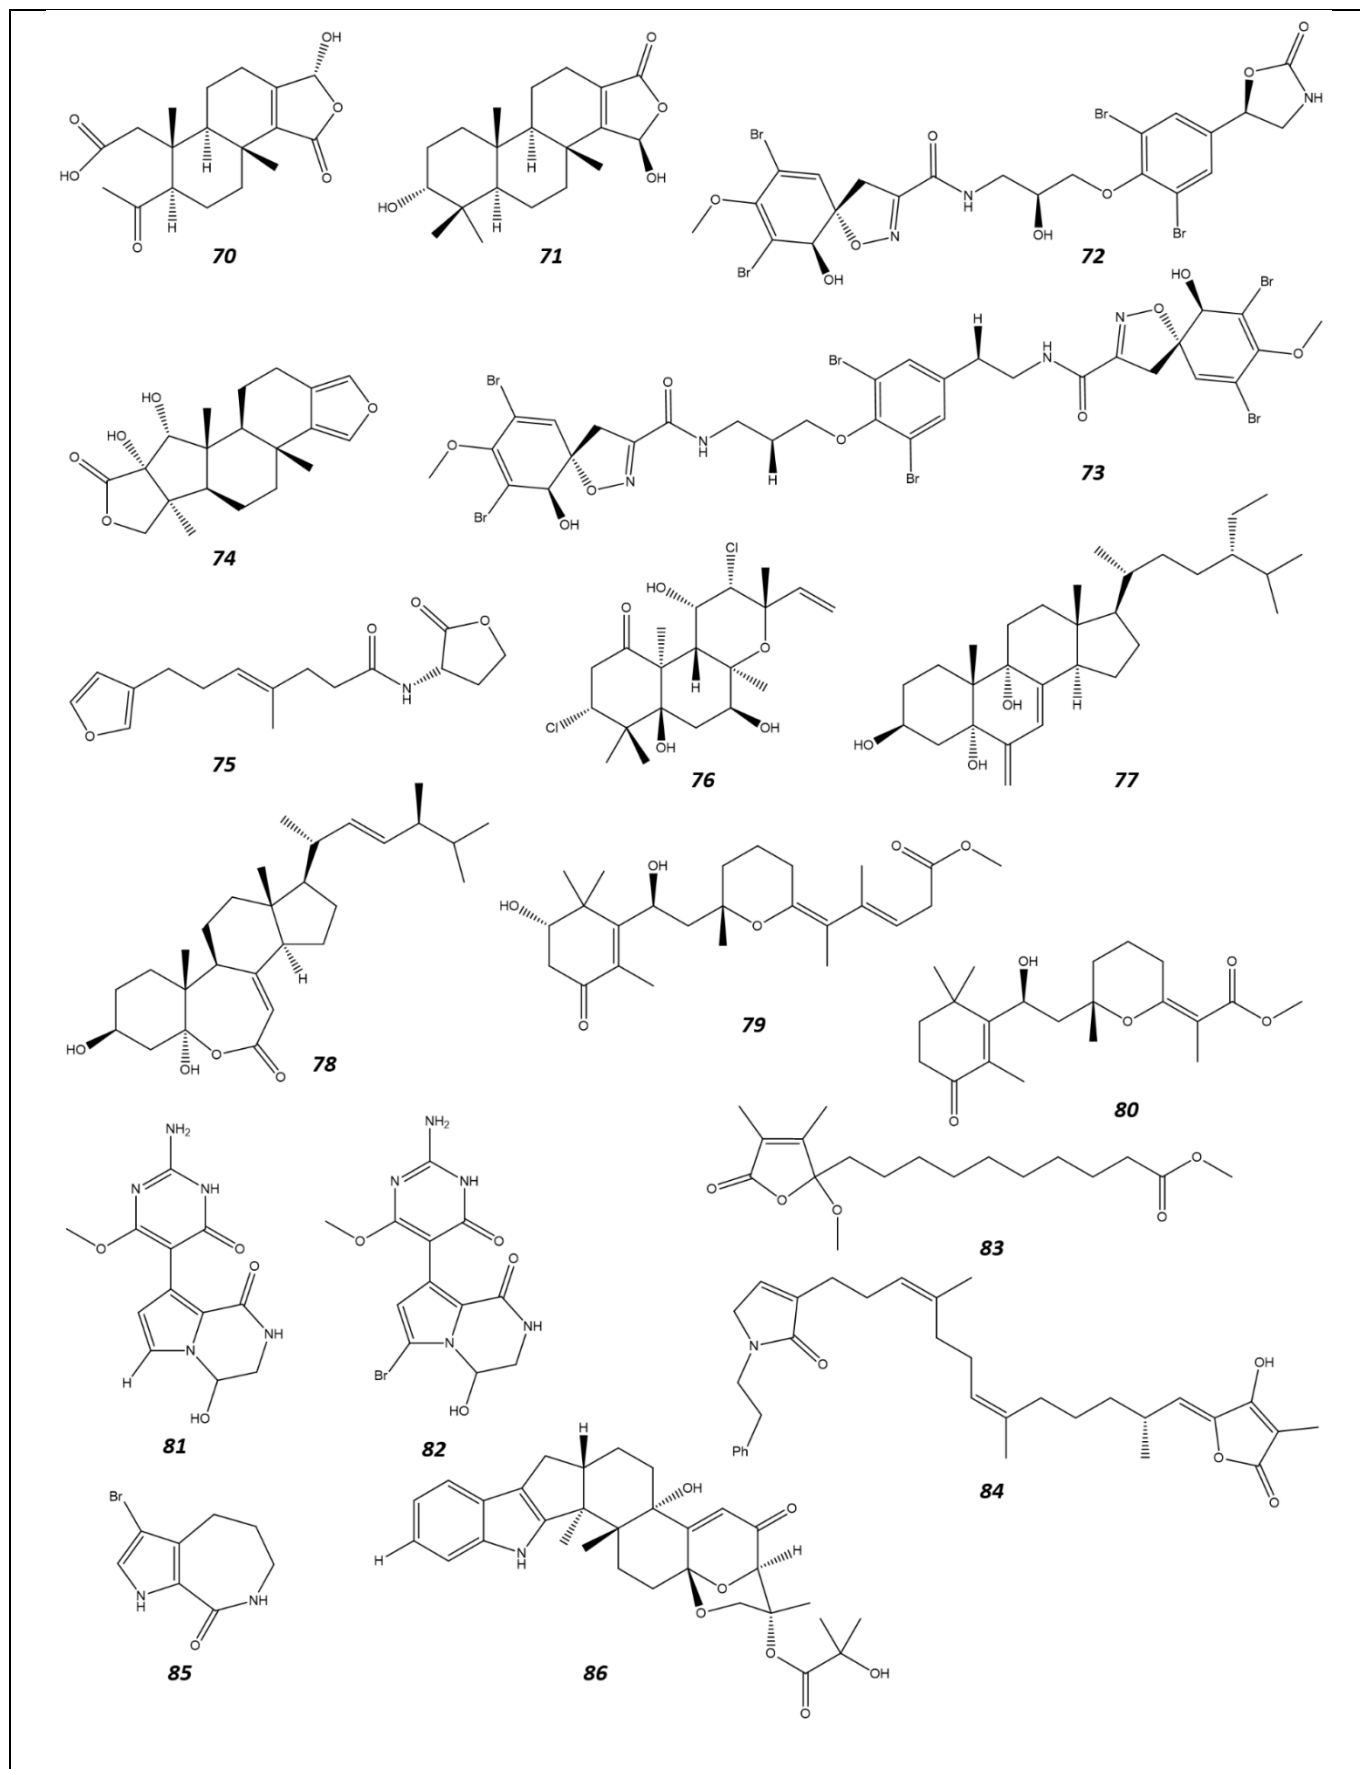

Fig. S3. Immunomodulation and Host Defense-related Activities NPs (continued)

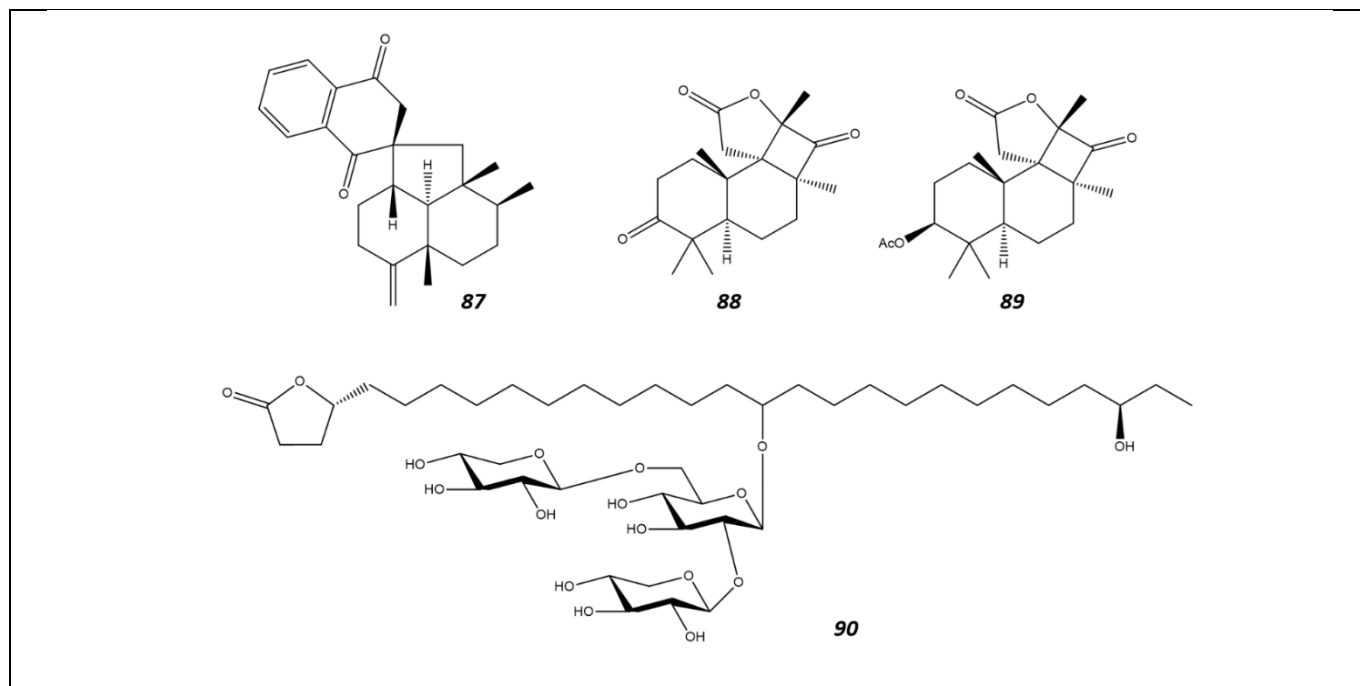

**Fig. S3. Immunomodulation and Host Defense-related Activities NPs**

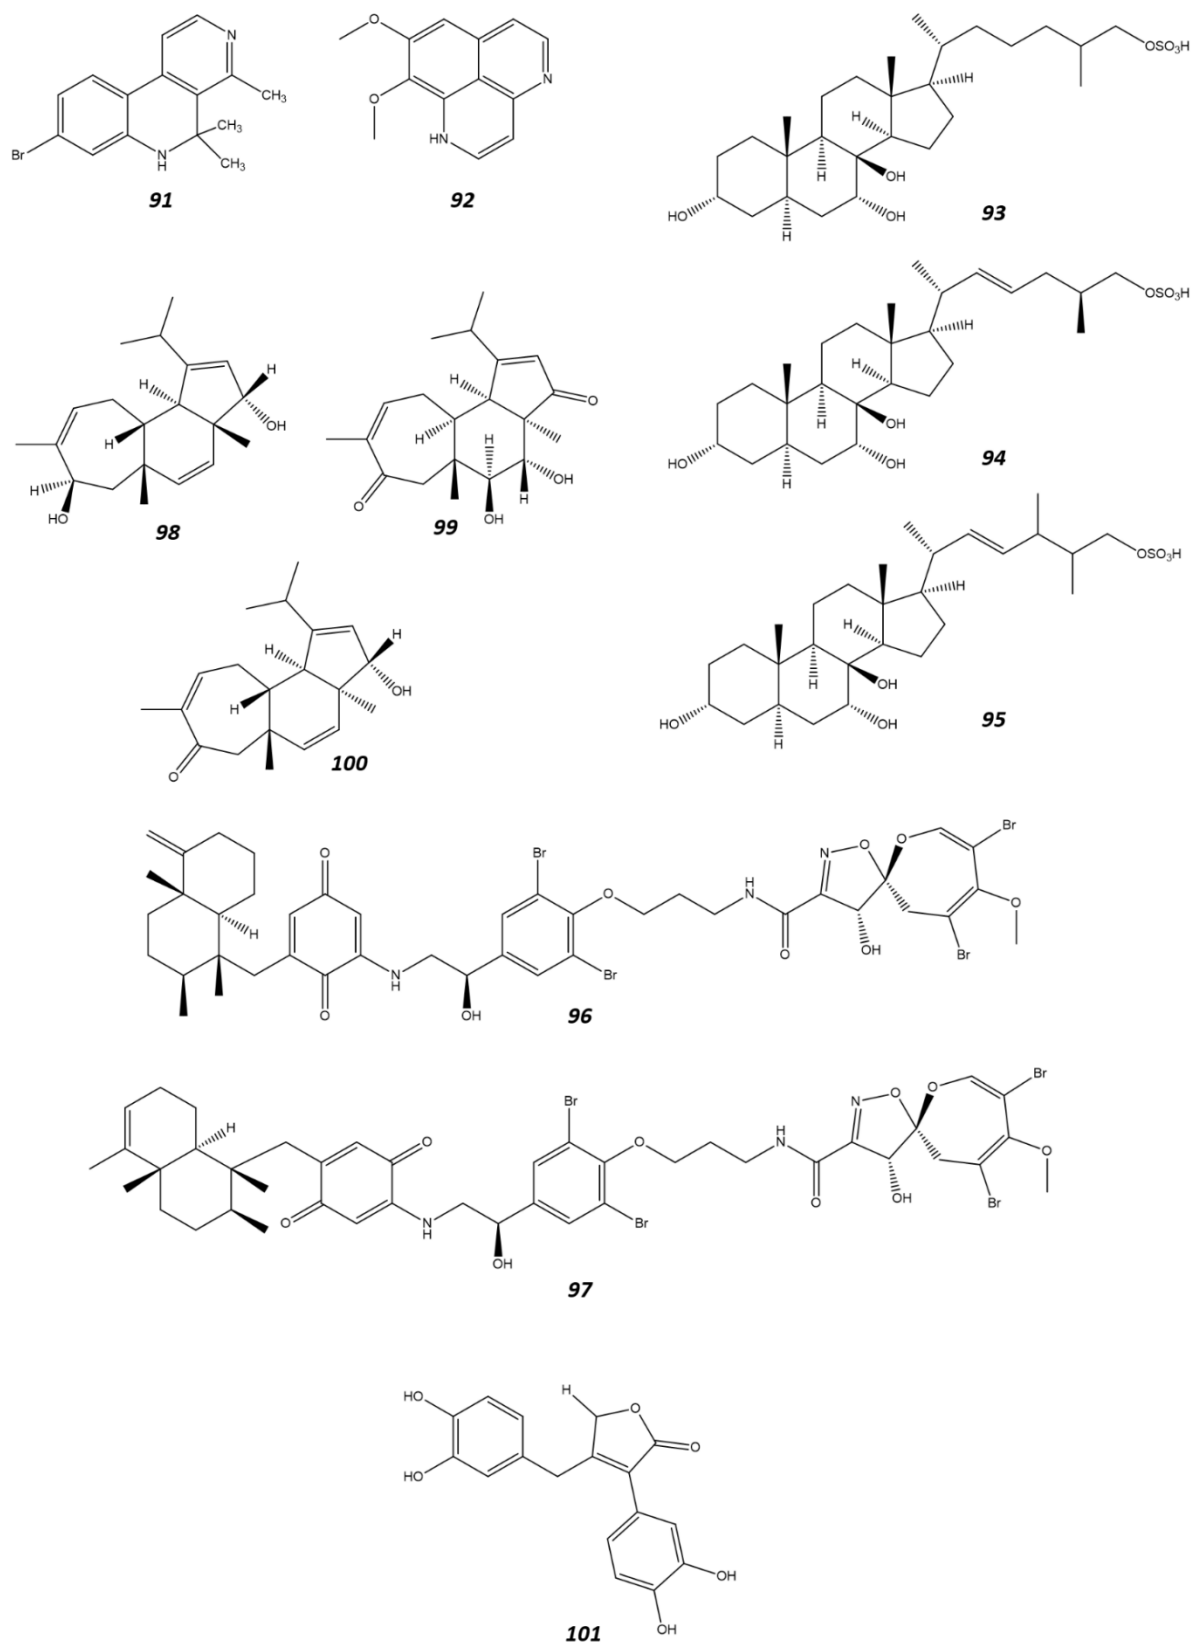

**Fig. S4. Neuroactive and Neuroprotective Activities NPs**

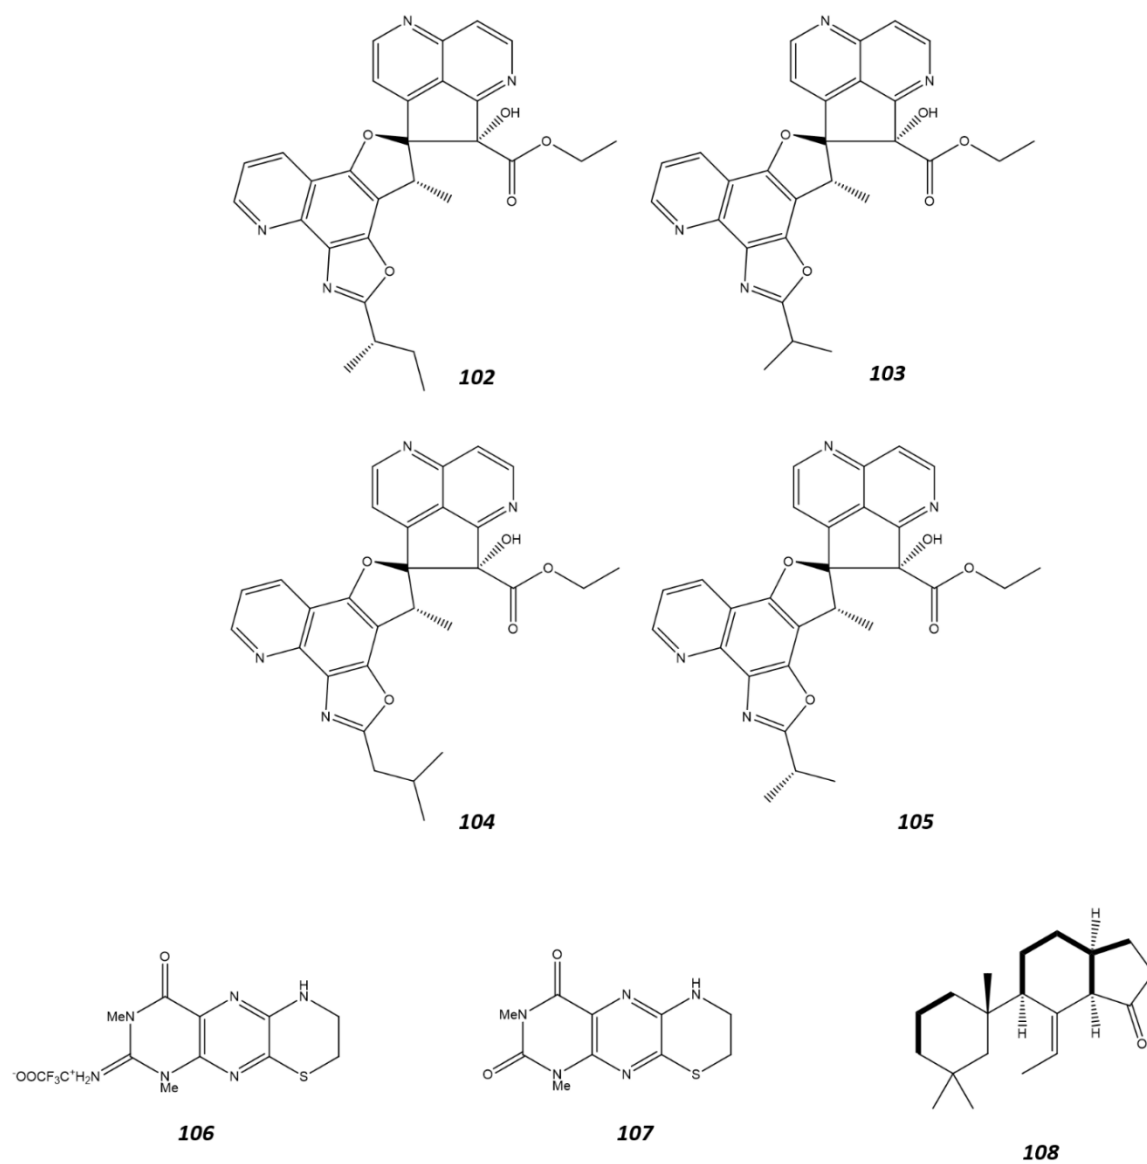

Fig. S5. Other Functional Activities NPs
